# Supplementary material
Source: PubMed Central journal article supplement (PMC7755733)
Supplement: NIHMS1615039-supplement-3.pdf [file NIHMS1615039-supplement-3.pdf]

# Sexual Health and Reproductive Empowerment for Young Adults (SHREYA) Scale

**Instructions:** Each of the following statements may or may not apply to you. Please rate how true each statement is for you.

*Note: You don't need to have ever had sex or currently have a sexual partner to answer this survey. If you are unsure about how to answer any items, please give your best guess.*

|                                                                                                                                                                               | Not at all true | A little true | Moderately true | Very true | Extremely true |
|-------------------------------------------------------------------------------------------------------------------------------------------------------------------------------|-----------------|---------------|-----------------|-----------|----------------|
| If I had a romantic partner, I would feel comfortable talking about whether or not I want to have children with them.                                                         |                 |               |                 |           |                |
| If I had a sexual partner, I would feel comfortable telling that person if I wanted to use a method to protect against infection or pregnancy, even when they didn't want to. |                 |               |                 |           |                |
| If I had a romantic partner, I would feel comfortable voicing disagreements with them.                                                                                        |                 |               |                 |           |                |
| I can freely choose if I get married.                                                                                                                                         |                 |               |                 |           |                |
| I can freely choose who I marry.                                                                                                                                              |                 |               |                 |           |                |
| I have the power to control if and when I have children.                                                                                                                      |                 |               |                 |           |                |
| I have a parent/guardian who would help me with my problems and troubles if I needed.                                                                                         |                 |               |                 |           |                |
| I have a parent or guardian who accepts me as I am.                                                                                                                           |                 |               |                 |           |                |
| I have a parent or guardian who trusts me to make the right decisions.                                                                                                        |                 |               |                 |           |                |
| I have a parent/guardian who helps me achieve my goals in life.                                                                                                               |                 |               |                 |           |                |
| I am able to do the things I want to do without worrying about my safety.                                                                                                     |                 |               |                 |           |                |
| Walking down the street, I feel like my body is my own.                                                                                                                       |                 |               |                 |           |                |

|                                                                                                              | Not at all true | A little true | Moderately true | Very true | Extremely true |
|--------------------------------------------------------------------------------------------------------------|-----------------|---------------|-----------------|-----------|----------------|
| I do not feel afraid that I will be forced to do something sexually when I don't want to.                    |                 |               |                 |           |                |
| I feel safe in my current living situation.                                                                  |                 |               |                 |           |                |
| I like myself.                                                                                               |                 |               |                 |           |                |
| I am worthy of love.                                                                                         |                 |               |                 |           |                |
| I know my body well.                                                                                         |                 |               |                 |           |                |
| My body belongs to me.                                                                                       |                 |               |                 |           |                |
| I can imagine what my future will be like.                                                                   |                 |               |                 |           |                |
| I have an idea of how I can eventually reach my goals.                                                       |                 |               |                 |           |                |
| My sexual needs or desires are important.                                                                    |                 |               |                 |           |                |
| I think it would be important to focus on my own pleasure as well as my partner's during sexual experiences. |                 |               |                 |           |                |
| I expect to enjoy sex.                                                                                       |                 |               |                 |           |                |
